# Supplementary material for: Single Cell Transcriptome and Surface Epitope Analysis of Ankylosing Spondylitis Facilitates Disease Classification by Machine Learning
Source: PubMed Central journal article supplement (PMC9135966; doi:10.3389/fimmu.2022.838636), 2022-05-13
Supplement: DataSheet_1.pdf [file DataSheet_1.pdf]

Supplementary Figure 1

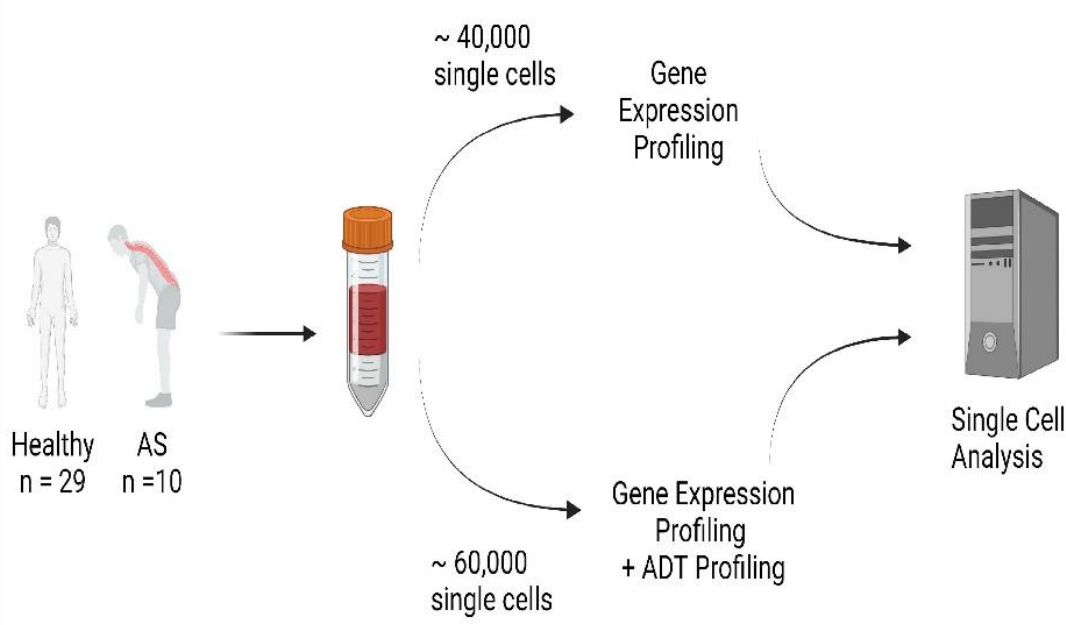

Supplementary Figure 1. Study design.

Supplementary Figure 2

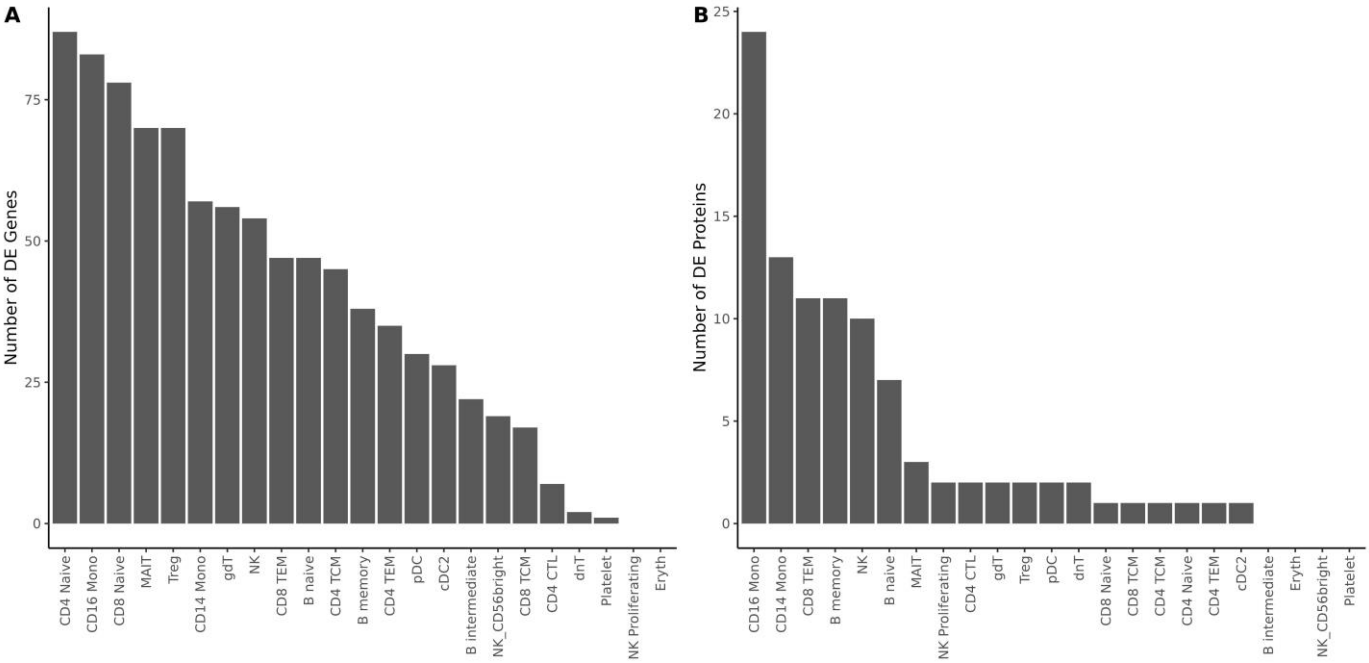

**Supplementary Figure 2. Features with cell-type specific expression differences associated with AS. (A) Number of DEGs per cell type. (B) Number of DEPs per cell type.**

Supplementary Figure 3

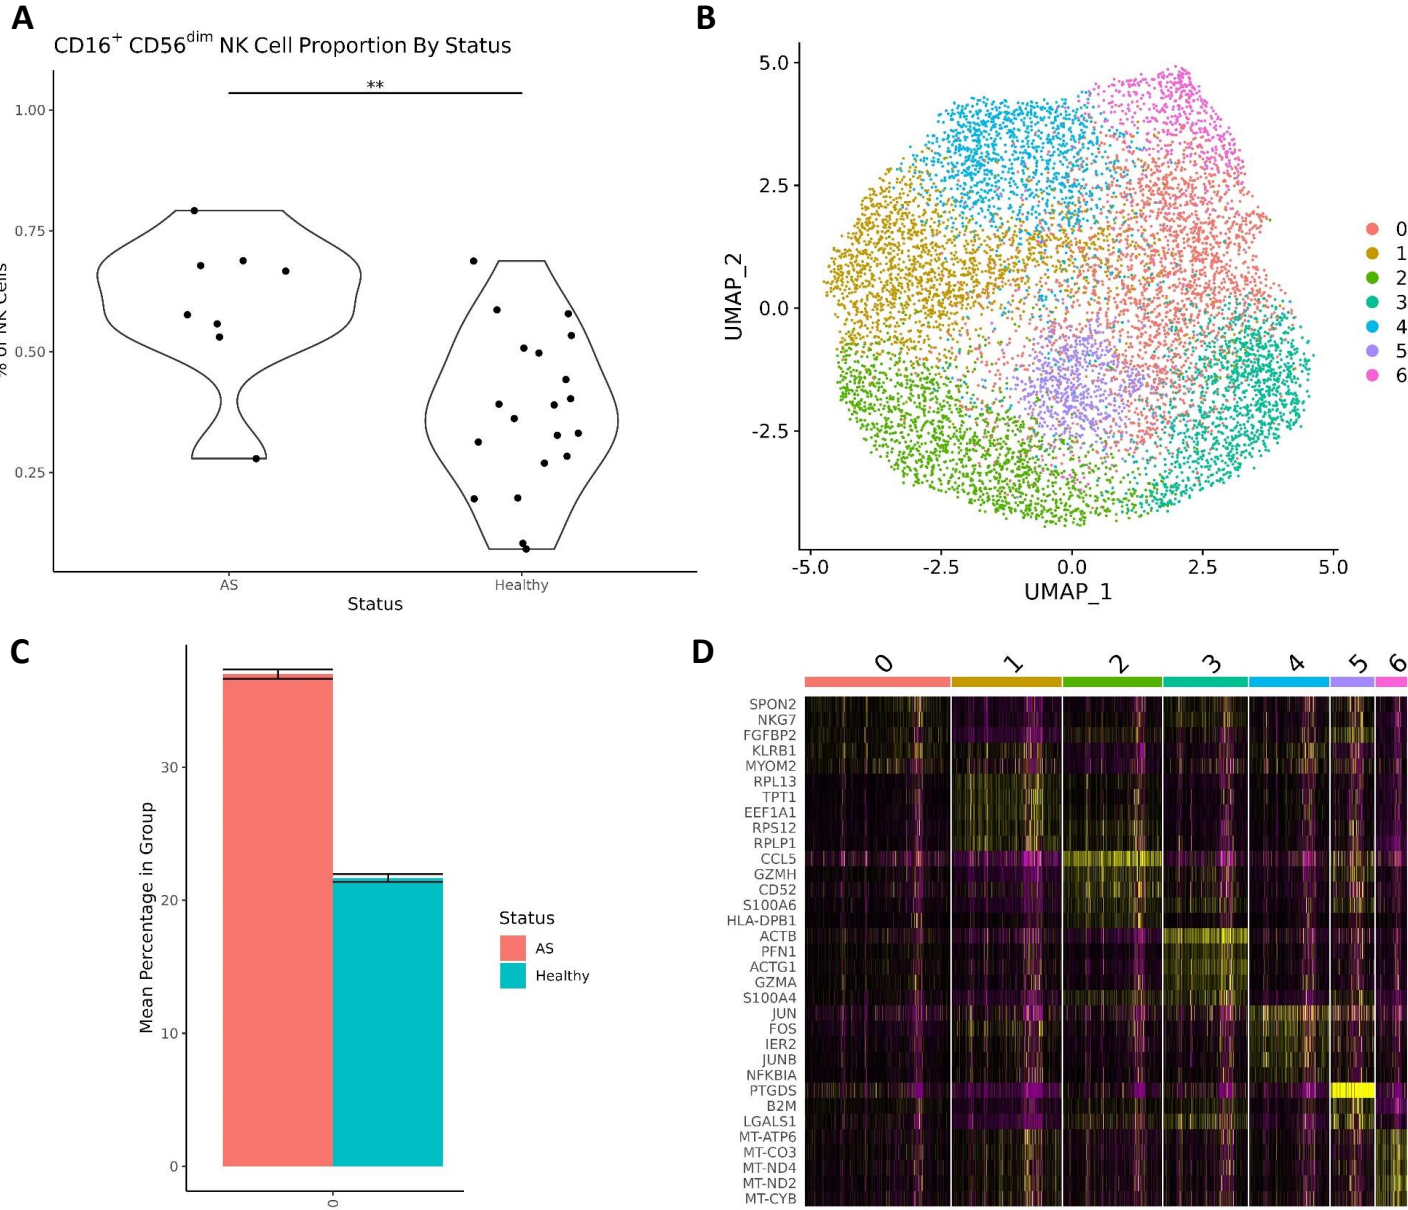

**Supplementary Figure 3. NK cell subset analysis, identified by de novo clustering.** (A) The mean percentage of CD16<sup>+</sup>CD56<sup>dim</sup> cells out of total NK cells in each subject, averaged across AS and across healthy groups. 2 patients with fewer than 10 CD16<sup>+</sup>CD56<sup>dim</sup> NK cells are not shown. \*\* indicates Wilcoxon rank sum test p-value = 0.006. (B) UMAP of NK clusters. (C) Mean percentage of Cluster 0 NK cells (out of total NK cells in each subject) between AS and healthy subjects. (D) Heatmap of top 5 RNA markers in each NK cluster.

Supplementary Figure 4

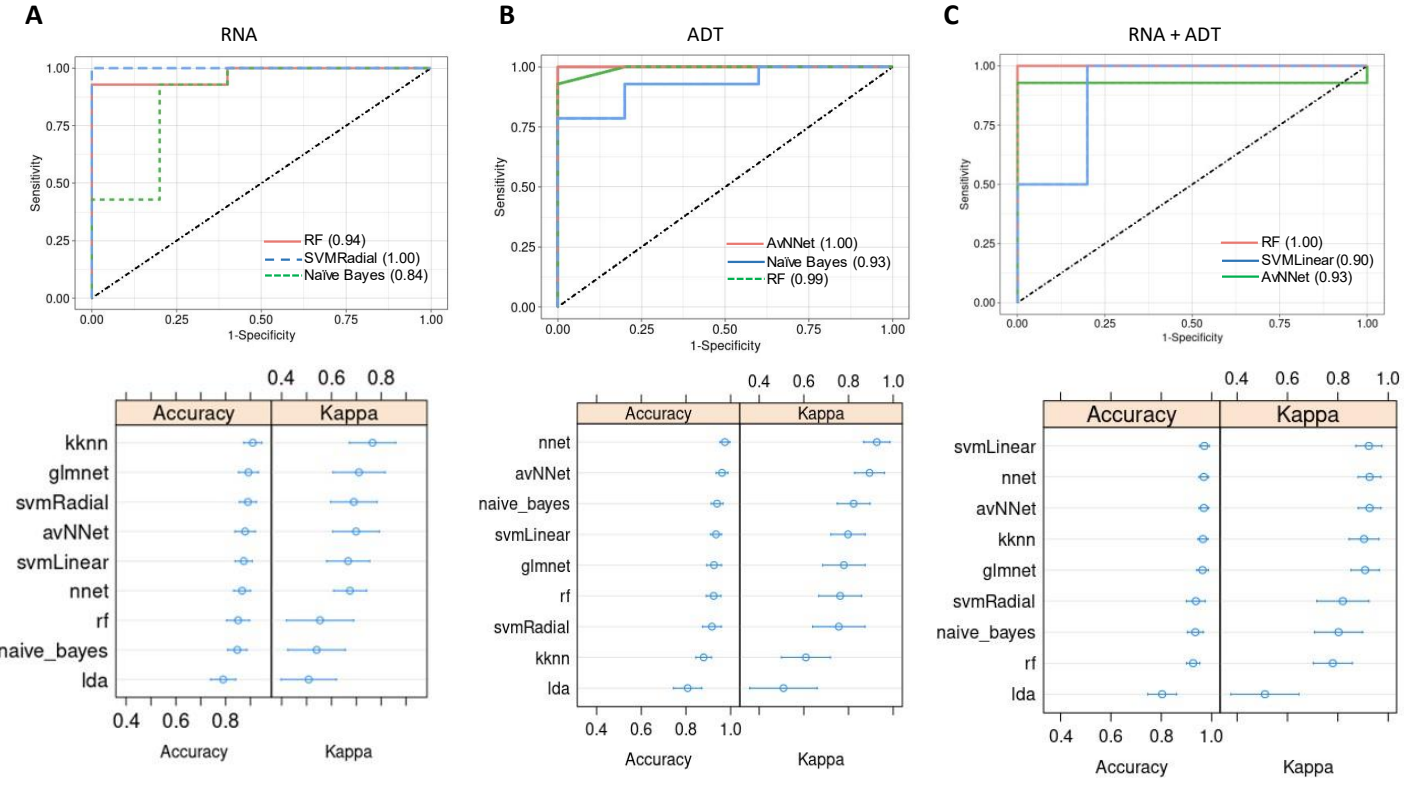

**Supplementary Figure 4. Machine learning classification of AS and healthy subjects based on within-subject normalized counts.** Feature expression normalized across cells within each subject were input to machine learning classification based on the top 20 features among (A) DEGs, (B) DEPs, and (C) both DEGs and DEPs. ROC curves based on test set classification. Error bars indicate 95% confidence interval.
